# Supplementary material
Source: ML conference proceedings conference paper supplement (https://proceedings.neurips.cc/paper_files/paper/2023/hash/6d3040941a2d57ead4043556a70dd728-Abstract.html)
Supplement: Supplementary file 1 [file 6d3040941a2d57ead4043556a70dd728-Supplemental-Conference.zip]

Archive with 2 entries (2 files):
- RiskQ_sup/main-appendix.pdf
- RiskQ_sup/src.zip
